# Supplementary material for: Retrospective Application of Risk Scores to Unruptured Anterior Communicating Artery Aneurysms
Source: MDPI journal article supplement (doi:10.3390/jcm13030789), 2024-01-30
Supplement: s1 [file s1]

| Recommendation according to UIATS |            |                            |                |           |
|-----------------------------------|------------|----------------------------|----------------|-----------|
| PHASES score                      | UIA repair | conservative<br>management | not definitive | Sum       |
| 4                                 | 2 (15%)    | 3 (23%)                    | 8 (62%)        | 13 (100%) |
| 5                                 | 15 (33%)   | 9 (19%)                    | 22 (48%)       | 46 (100%) |
| 6                                 | 2 (11%)    | 14 (78%)                   | 2 (11%)        | 18 (100%) |
| 7                                 | 1 (20%)    | 2 (40%)                    | 2 (40%)        | 5 (100%)  |
| 8                                 | 10 (53%)   | 3 (11%)                    | 6 (31%)        | 19 (100%) |
| 9                                 | 0          | 4 (80%)                    | 1 (20%)        | 5 (100%)  |
| 10                                | 1 (33%)    | 0                          | 2 (67%)        | 3 (100%)  |
| 11                                | 1 (12%)    | 2 (25%)                    | 5 (63%)        | 8 (100%)  |
| 12                                | 1 (20%)    | 4 (80%)                    | 0              | 5 (100%)  |
| 15                                | 2 (100%)   | 0                          | 0              | 2 (100%)  |

**Supplementary Table S1.** Distribution of the PHASES scores across UIATS recommendations in patients with unruptured anterior communicating artery aneurysms. UIA — unruptured intracranial aneurysm
